# Supplementary material for: Antagonism of the histamine H4 receptor reduces LPS-induced TNF production in vivo
Source: PubMed Central journal article supplement (PMC3654183; doi:10.1007/s00011-013-0612-5), 2013-03-27
Supplement: 11_2013_612_MOESM1_ESM.pdf [file 11_2013_612_MOESM1_ESM.pdf]

**SUPPLEMENTAL DATA**

**Table S1: Pharmacokinetics of JNJ 28307474 in mice.** Single dose pharmacokinetics in mice of JNJ 28307474 was been evaluated in non-fasted BALB/c female mice. Compound was administered orally (in 20% hydroxypropyl-beta-cyclodextrin). Three mice were used per time point. LC/MS analysis was used to quantitate the plasma levels.

| <b>Dose</b> | <b>T<sub>max</sub> (h)</b> | <b>C<sub>max</sub> (μM)</b> | <b>AUC (h*μM)</b> | <b>t<sub>1/2</sub> (h)</b> |
|-------------|----------------------------|-----------------------------|-------------------|----------------------------|
| 3 mg/kg     | 1.00                       | 0.33                        | 4.02              | 5.03                       |
| 20 mg/kg    | 1.00                       | 3.76                        | 32.59             | 4.30                       |

**Figure S1. Inactivation of liver macrophages by MP.** Female wild-type mice (7-8 mice per group) were treated with 2 g/kg MP or vehicle by tail vein injection. Forty-four hours later, the livers were collected and stained with F4/80 to visualize the number of macrophages.

**Figure S2. Depletion of liver macrophages by CL.** A) Female wild-type mice (7-8 mice per group) were treated with 10 mg/kg CL or vehicle (empty liposomes; EL) by tail vein injection 44 h before administration of 20 μg LPS or vehicle i.p. Two hours later, the livers were collected and stained with F4/80 to quantitate the number of macrophages (A). The number of F4/80 positive cells was quantitated and the data presented as the average along with SEM (B).

**Figure S3. LPS induces TNF production from F4/80<sup>+</sup> cells in the liver.** Livers were collected from untreated mice (A), mice treated with 20 μg LPS i.p. (B), or mice treated with with 20 μg ng/mL LPS i.p. and 20 mg/kg JNJ 7777120 (C). Frozen sections were stained with F4/80 (green) and anti-TNF (red) and detected by immunofluorescence.

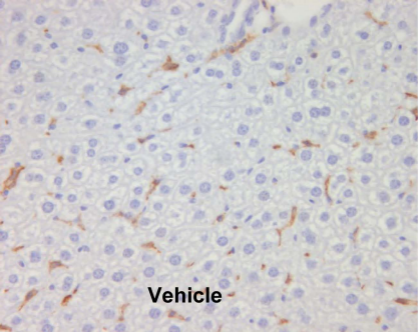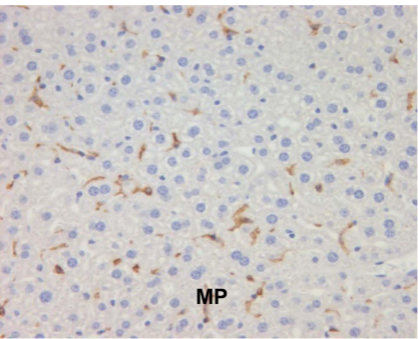

A)

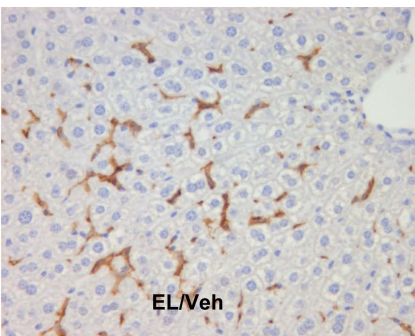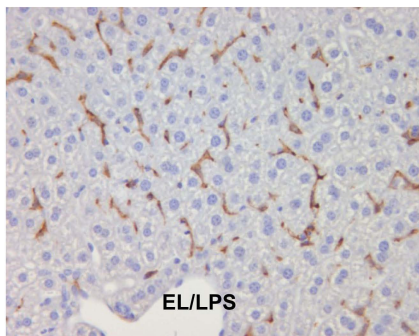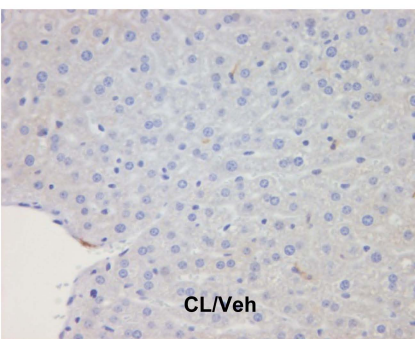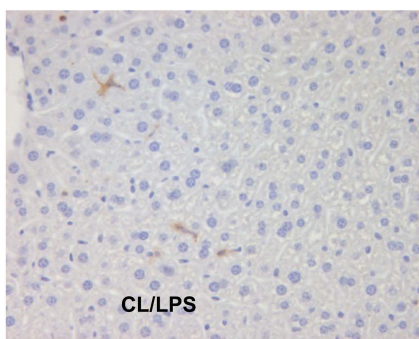

B)

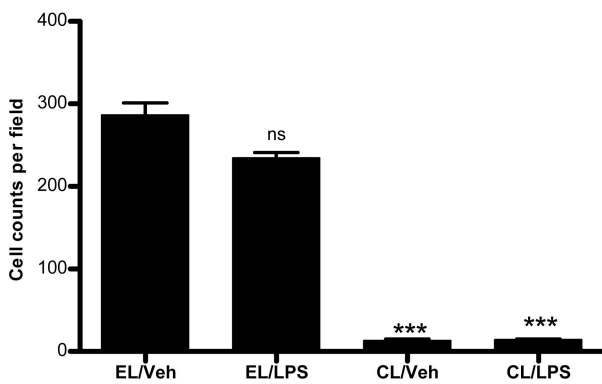

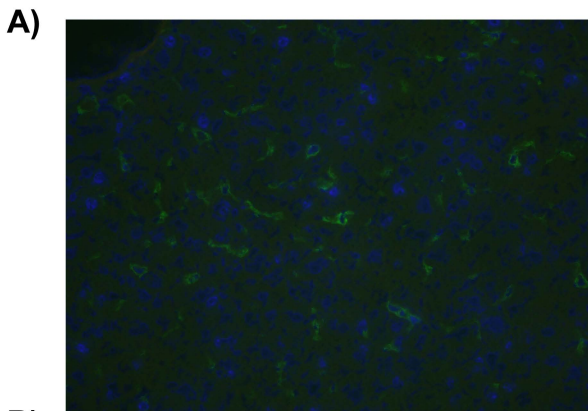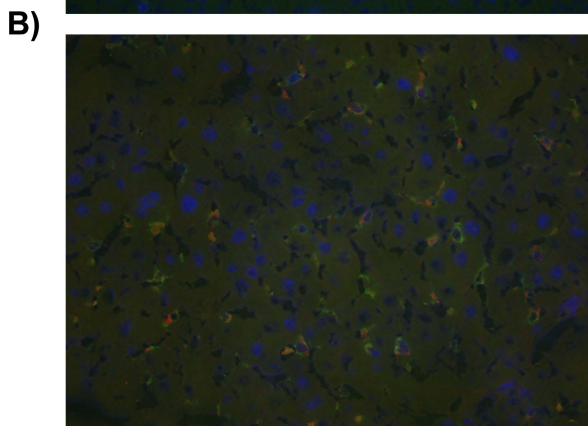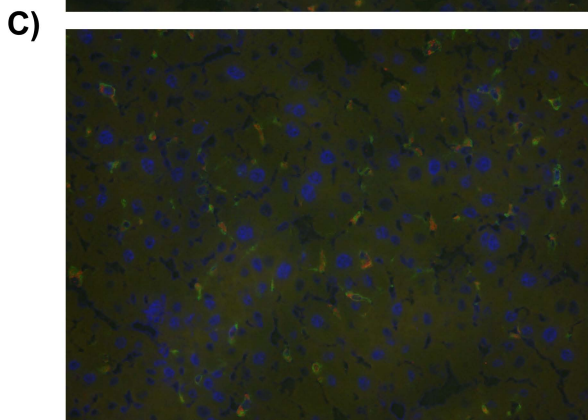

Figure S3
